# Supplementary material for: Retinal Pigment Epithelium in Human Donor Eyes Contains Higher Levels of Bisretinoids Including A2E in Periphery than Macula
Source: PubMed Central journal article supplement — Invest Ophthalmol Vis Sci. 2022 Jun 7;63(6):6. doi: 10.1167/iovs.63.6.6 (PMC9187938; doi:10.1167/iovs.63.6.6), 2022-06-07
Supplement: iovs-63-6-6_s001.pdf [file iovs-63-6-6_s001.pdf]

## Retinal pigment epithelium in human donor eyes contains higher levels of bisretinoids including A2E in periphery than macula

Ankita Kotnala<sup>1</sup>, Srinivasan Senthilkumari<sup>2</sup>, Gong Wu<sup>3</sup>, Thomas Gordon Stewart<sup>3</sup>, Christine A. Curcio<sup>4</sup>, Nabanita Halder<sup>1</sup>, Sundararajan Baskar Singh<sup>5</sup>, Atul Kumar<sup>6</sup>, Thirumurthy Velpandian<sup>1\*</sup>

<sup>1</sup>Ocular Pharmacology & Pharmacy Division, All India Institute of Medical Sciences, New Delhi, India; <sup>2</sup>Department of Ocular Pharmacology, Aravind Medical Research Foundation (AMRF), Dr. G. Venkataswamy Eye Research Institute, #1, Anna Nagar, Madurai -20, Tamilnadu, India; <sup>3</sup>Department of Biostatistics, Vanderbilt University Medical Centre, Nashville, TN; <sup>4</sup>Department of Ophthalmology and Visual Sciences, University of Alabama at Birmingham, Birmingham, AL; <sup>5</sup>Department of Biophysics, All India Institute of Medical Sciences, New Delhi, India; <sup>6</sup>Department of Ophthalmology, Dr. Rajendra Prasad Centre for Ophthalmic Sciences, All India Institute of Medical Sciences, New Delhi, India.

### Supplemental Information

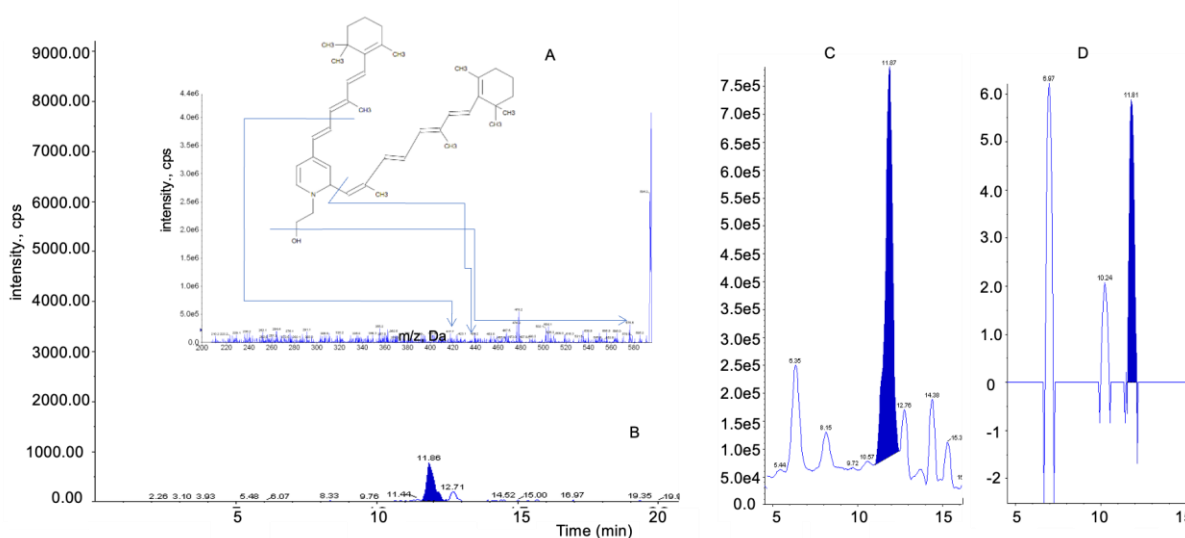

**Supplemental Figure 1.** A) Shows the fragmentation pattern for A2DHPE at [M+H]<sup>+</sup> 594.4, B) representative peak from ESI-MRM mode of A2DHPE at [M+H]<sup>+</sup> 594.4/576.5, C) representative chromatogram from ESI-SIM mode of quantification [M+H]<sup>+</sup> 594.4, D) APCI-MRM chromatogram for A2DHPE at [M+H]<sup>+</sup> 594.4/576.5.

“Reprinted from J Chromatogr B Analyt Technol Biomed Life Sci, 1073, A Kotnala, S Senthilkumari, N Halder, A Kumar, T Velpandian, Microwave assisted synthesis for A2E and development of LC-ESI-MS method for quantification of ocular bisretinoids in human retina, 10-18, Copyright (2018), with permission from Elsevier.”

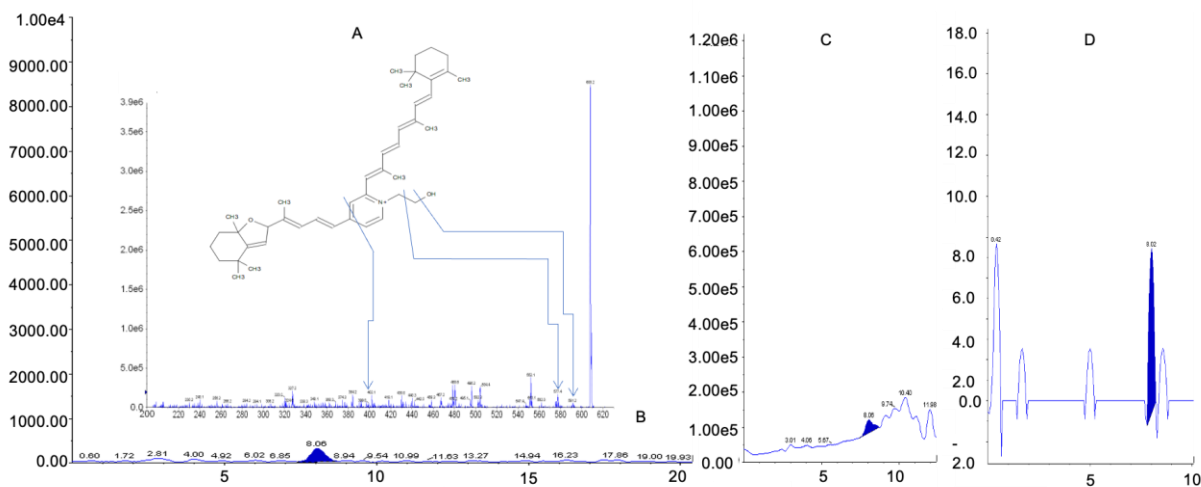

**Supplemental Figure 2.** A) Shows the fragmentation pattern for MFA2E at [M] 608.2, B) representative peak from ESI-MRM mode of MFA2E at [M] 608.2/ 591.2, C) representative chromatogram from ESI-SIM mode of quantification at [M] 608.2, D) APCI-MRM chromatogram for MFA2E at [M] 608.2/ 591.2 .

“Reprinted from J Chromatogr B Analyt Technol Biomed Life Sci, 1073, A Kotnala, S Senthilkumari, N Halder, A Kumar , T Velpandian, Microwave assisted synthesis for A2E and development of LC-ESI-MS method for quantification of ocular bisretinoids in human retina, 10-18, Copyright (2018), with permission from Elsevier.”

**Supplemental Table 1:** Macula vs peripheral retina comparison of bisretinoids (measured as EEEQ)

| <b>Variable</b>                                                    | <b>Level</b> | <b>N</b> | <b>Median (IQR)</b> | <b><i>p</i> (KW)</b> |
|--------------------------------------------------------------------|--------------|----------|---------------------|----------------------|
| A2E                                                                | P            | 252      | 0.27 (0.13, 0.63)   | < 0.0001             |
|                                                                    | M            | 241      | 0.05 (0.03, 0.09)   |                      |
| A2GPE                                                              | P            | 251      | 2.10 (1.44, 3.12)   | < 0.0001             |
|                                                                    | M            | 238      | 0.35 (0.24, 0.49)   |                      |
| A2DHPE                                                             | P            | 254      | 0.43 (0.21, 1.08)   | < 0.0001             |
|                                                                    | M            | 240      | 0.05 (0.03, 0.10)   |                      |
| Monofuran-A2E                                                      | P            | 253      | 2.30 (1.37, 3.58)   | < 0.0001             |
|                                                                    | M            | 240      | 0.29 (0.14, 0.57)   |                      |
| periphery; M, macula; IQR, interquartile range; KW, Kruskal-Wallis |              |          |                     |                      |

**Supplemental Table 2: Levels of bisretinoids (measured as EEEQ), in two age groups**

| <b>Bisretinoid</b>       | <b>Overall</b> |                     | <b>&lt;60 years</b> |                     | <b>≥60 years</b> |                     |
|--------------------------|----------------|---------------------|---------------------|---------------------|------------------|---------------------|
|                          | <b>N</b>       | <b>Median (IQR)</b> | <b>N</b>            | <b>Median (IQR)</b> | <b>N</b>         | <b>Median (IQR)</b> |
| <b>A2E</b>               | 234            | 5.0<br>(2.7, 10.2)  | 124                 | 3.8<br>(2.2, 6.8)   | 110              | 7.5<br>(3.6, 16.5)  |
| <b>A2GPE</b>             | 230            | 5.9<br>(3.5, 9.2)   | 120                 | 4.8<br>(3.0, 7.5)   | 110              | 7.1<br>(4.5, 10.7)  |
| <b>A2DHPE</b>            | 233            | 8.3<br>(4.5, 16.6)  | 122                 | 6.4<br>(3.6, 10.7)  | 111              | 12.0<br>(6.1, 27.5) |
| <b>Monofuran-A2E</b>     | 233            | 8.8<br>(3.6, 17.5)  | 123                 | 8.0<br>(2.4, 21.0)  | 110              | 9.6<br>(5.2, 14.4)  |
| IQR, interquartile range |                |                     |                     |                     |                  |                     |

**Supplemental Table 3: Left eye vs right eye levels of bisretinoids (measured as EEEQ)**

| <b>Variable Eye</b>                                                       | <b>Level</b> | <b>N</b> | <b>Median (IQR)</b> | <b><i>p</i> (KW)</b> |
|---------------------------------------------------------------------------|--------------|----------|---------------------|----------------------|
| A2E                                                                       | LE           | 228      | 0.12 (0.05, 0.30)   | 0.5888               |
|                                                                           | RE           | 265      | 0.11 (0.04, 0.30)   |                      |
| A2GPE                                                                     | LE           | 225      | 0.79 (0.36, 2.14)   | 0.6621               |
|                                                                           | RE           | 264      | 0.85 (0.34, 2.17)   |                      |
| A2DHPE                                                                    | LE           | 228      | 0.16 (0.05, 0.47)   | 0.6150               |
|                                                                           | RE           | 266      | 0.15 (0.05, 0.44)   |                      |
| monofuran-A2E                                                             | LE           | 227      | 0.90 (0.33, 2.27)   | 0.9805               |
|                                                                           | RE           | 266      | 0.97 (0.28, 2.61)   |                      |
| LE, left eye; RE, right eye; IQR, interquartile range; KW, Kruskal-Wallis |              |          |                     |                      |

**Supplemental Table 4: Male vs Female comparison of bisretinoids (measured as EEEQ)**

| <b>Variable</b>                                                  | <b>Level</b> | <b>N</b> | <b>Median (IQR)</b> | <b><i>p</i> (KW)</b> |
|------------------------------------------------------------------|--------------|----------|---------------------|----------------------|
| <b>Sex</b>                                                       | <b>M</b>     |          |                     |                      |
|                                                                  | <b>F</b>     |          |                     |                      |
| A2E                                                              | M            | 280      | 0.11 (0.05, 0.27)   | 0.0540               |
|                                                                  | F            | 213      | 0.14 (0.05, 0.38)   |                      |
| A2GPE                                                            | M            | 278      | 0.82 (0.35, 2.13)   | 0.8826               |
|                                                                  | F            | 211      | 0.82 (0.35, 2.20)   |                      |
| A2DHPE                                                           | M            | 279      | 0.14 (0.05, 0.39)   | 0.0709               |
|                                                                  | F            | 215      | 0.20 (0.05, 0.56)   |                      |
| monofuran-A2E                                                    | M            | 277      | 0.89 (0.31, 2.39)   | 0.5221               |
|                                                                  | F            | 216      | 1.13 (0.29, 2.53)   |                      |
| M, Male; F, Female; IQR, interquartile range; KW, Kruskal-Wallis |              |          |                     |                      |
